# Supplementary material for: Comparison of the safety and efficacy of remimazolam for sedation during bronchoscopy: a meta-analysis of randomized controlled trials
Source: PeerJ. 2026 Jan 9;14:e20552. doi: 10.7717/peerj.20552 (PMC12794641; doi:10.7717/peerj.20552)
Supplement: Supplemental Information 2 [file peerj-14-20552-s002.xlsx]

## Sheet: Sheet1
Clinical trials	Age (Years)	Sex (M/F)	ASA (I/II/III)	BMI (kg/m2)	Number of patients	Dose of opioids (μg/kg)
Zhou 2024
Remimazolam	60(52-66)	126/56	6/162/14	22.60 ± 2.74	182	100-200
Dexmedetomidine	61(55-65)	116/66	10/164/8	22.24 ± 2.78	182	0.4-0.8
Zhang 2023
Remimazolam	63.57 ± 13.32	48/48	-	21.26 ± 3.81	96	200
Propofol	65.11 ± 13.46	44/52	-	21.81 ± 3.70	96	1500
Xu 2024
Remimazolam	60.7 ± 4.3	40/20	22/38/0	24.1 ± 1.9	60	1000-2000
Dexmedetomidine	60.9 ± 4.2	41/19	23/37/0	24.5 ± 2.3	60	0.5
Luo 2025
Remimazolam	71.3 ± 4.0	24/9	0/29/4	24.8 ± 5.7	33	200
Propofol	71.5 ± 3.7	21/12	0/27/6	25.2 ± 6.1	33	1500
Chai 2025
Remimazolam	70.2 ± 4.1	17/13	2/28/0	22.4 ± 2.7	30	200
Propofol	69.7 ± 4.4	18/12	1/29/0	23.4 ± 2.7	30	2000
Wu 2024
Remimazolam	70.37 ± 4.07	26/20	6/33/7	22.09 ± 3.65	46	135
Midazolam	69.21 ± 3.59	29/19	7/32/9	22.19 ± 3.06	48	45
Chen 2024
Remimazolam	43.33 ± 15.33	23/7	9/20/1	20.70 ± 2.77	30	93
Dexmedetomidine	48.97 ± 10.01	24/6	2/25/2	21.63 ± 3.94	30	0.6
Chen 2022
Remimazolam	57.05 ± 5.60	55/18	25/48/0	24.58 ± 2.19	73	1000-2000
Dexmedetomidine	56.05 ± 5.99	53/20	27/46/0	25.11 ± 2.02	73	0.2-0.7
Zhou 2022
Remimazolam	49.7 ± 13.4	72/83	27/126/2	23.0 ± 2.62	155	200
Propofol	51.9 ± 11.8	82/73	19/135/1	23.5 ± 2.75	155	2000
Pan 2022
Remimazolam	61.13 ± 8.62	12/3	0/7/7	20.08 ± 3.81	15	400
Propofol	61.13 ± 7.24	15/0	0/11/4	21.73 ± 2.89	15	1500
Pastis 2019
Remimazolam	62.7 ± 12.09	139/164	-	28.4 ± 6.39	303	5000
Midazolam	61.5 ± 14.03	35/34	-	28.0 ± 5.79	69	1000-1750
Gao 2022
Remimazolam	59.9 ± 7.3	17/13	1/29/0	23.5 ± 2.8	30	6000
Propofol	58.9 ± 10.8	22/8	2/28/0	23.7 ± 3.9	30	2000
Kim 2023
Remimazolam	65 (55–74)	31/18	-	23.9 (21.0–25.5)	49	2500
Midazolam	68 (60–75)	30/21	-	21.9 (19.8–24.0)	51	500
