# Supplementary material for: Comparison of the safety and efficacy of remimazolam for sedation during bronchoscopy: a meta-analysis of randomized controlled trials
Source: PeerJ. 2026 Jan 9;14:e20552. doi: 10.7717/peerj.20552 (PMC12794641; doi:10.7717/peerj.20552)
Supplement: Supplemental Information 3 [file peerj-14-20552-s003.xlsx]

## Sheet: Sheet1
study		Procedure success, n (%)	Anesthesia onset time (min)	Procedure duration (min)	Wake up time (min)	Patient satisfaction		Bradycardia	Hypertension	Hypotension	Tachycardia	Hypoxemia
1	remimazolam(182) vs dexmedetomidine(182)	167(91.8)/111(60.8)	5(0.12)/7(0.5)	13(2.25)/13(2.12)		9.92(0.48)/9.83(0.55)		11/82	12/15	52/131	12/4	26/80
2	remimazolam(96) vs propofol(96)			10.42(5.41)/11.21(6.81)	5.6(2.47)/6.85(5.57)	9.44(0.65)/9.58(0.69)
3	remimazolam(60) vs dexmedetomidine(60)	55(91.7)/52(86.7)	6.6(1.9)/9.0(1.2)	22.0(3.1)/22.3(3.5)	4.4(1.3)/7.0(1.5)	5.0(0.25)/4.0(0.25)		5/13	3/2	13/6	6/3	10/16
4	remimazolam(33) vs propofol(33)	31(93.9)/32(97)						1/3	5/4	3/10	6/3	3/15
5	remimazolam(30) vs propofol(30)	29(96.7)/30(100)			12.5(3.0)/11.8(2.4)	9.4(0.8)/9.2(0.9)
6	remimazolam(46) vs midazolam(48)	30(65.2)/19(39.6)	3.9(1.2)/4.2(1.4)	5.7(2.2)/5.6(2.3)
7	remimazolam(30) vs dexmedetomidine(30)	28(93.3)/26(86.7)				9.47(0.9)/8.83(1.44)		2/4	0/1		7/2
8	remimazolam(73) vs dexmedetomidine(73)	69(94.5)/67(91.8)	13.22(1.7)/15.12(2.07)	18.12(3.32)/18.42(3.0)	2.52(1.11)/3.62(1.28)	8.82(0.71)/8.66(0.63)		3/2	2/3	9/8		8/10
9	remimazolam(155) vs propofol(155)	154(99.4)/154(99.4)	1.02(0.15)/0.8(0.12)	19.5(2.5)/14.5(1.5)	11.0(2.28)/7(1.5)				13/5	22/49
10	remimazolam(15) vs propofol(15)		1.26(0.66)/1.25(0.41)	36.67(19.85)/44.4(22.72)	2.33(0.86)/6.23(3.25)			0/1		6/5
11	remimazolam(303) vs midazolam(69)	244(80.6)/23(32.9)		64(1.7)/70(5)	11.6(0.7)/18(1.27)			13/3	186/41	127/34	4/0	66/13
12	remimazolam(32) vs propofol(31)		1.87(0.21)/1.07(0.28)		13.1(3.1)/10.5(3.5)	8.97(0.96)/9.13(0.86)		2/5	1/2	11/22	6/9
13	remimazolam(49) vs midazolam(51)	33(67.3)/27(52.9)	2(0.75)/3(0.75)	7(1.25)/8(1.5)	2(1)/5(2.75)			0/0		1/1	2/2	1/1
